# Supplementary material for: Single-virus tracking reveals variant SARS-CoV-2 spike proteins induce ACE2-independent membrane interactions
Source: PubMed Central journal article supplement (PMC9733935; doi:10.1126/sciadv.abo3977), 2022-12-09
Supplement: sciadv.abo3977_sm.pdf [file sciadv.abo3977_sm.pdf]

Supplementary Materials for  
**Single-virus tracking reveals variant SARS-CoV-2 spike proteins induce  
ACE2-independent membrane interactions**

Shaun M. Christie *et al.*

Corresponding author: Eli Rothenberg, [eli.rothenberg@nyulangone.org](mailto:eli.rothenberg@nyulangone.org);  
Nathaniel R. Landua, [nathaniel.landau@med.nyu.edu](mailto:nathaniel.landau@med.nyu.edu)

*Sci. Adv.* **8**, eabo3977 (2022)  
DOI: 10.1126/sciadv.abo3977

**This PDF file includes:**

Figs. S1 to S9

**Supplementary Figures:**

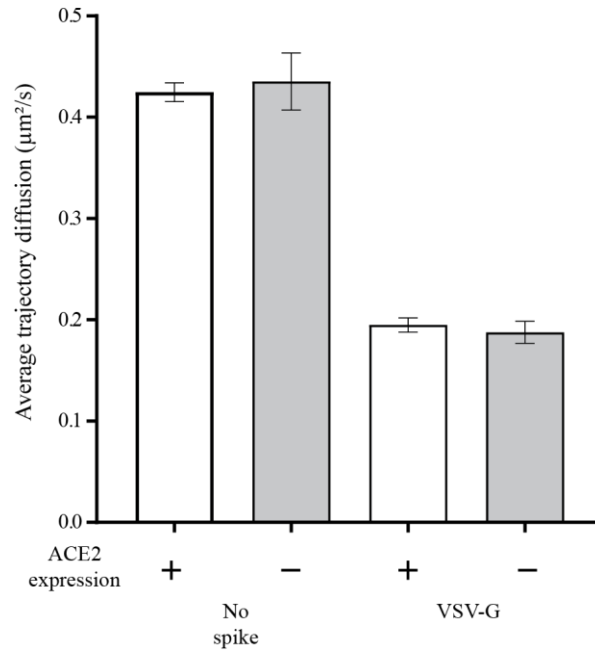

**Supplementary Figure 1:**  $D_{\text{traj}}$  for NS and VSV-G PVP controls is independent of ACE2 expression

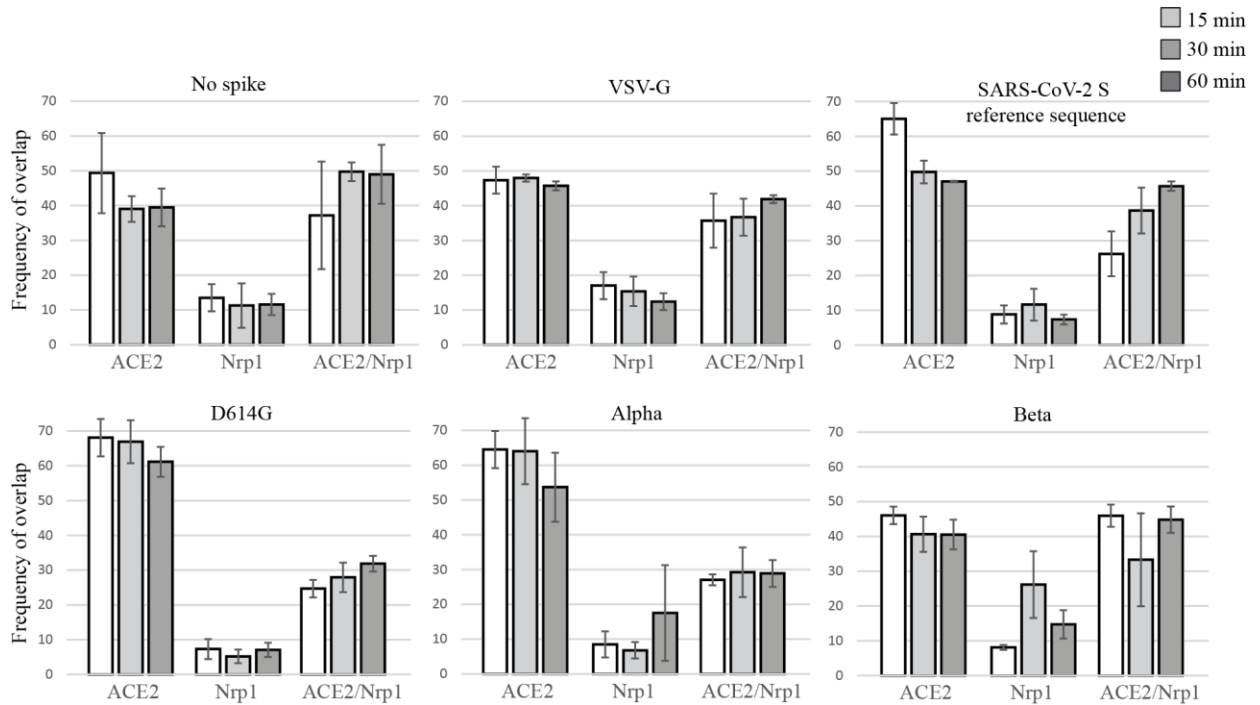

**Supplementary Figure 2:** PVP were categorized into colocalization populations based on Fig. 2D for each time point. Trends are relatively consistent for each species and time point.

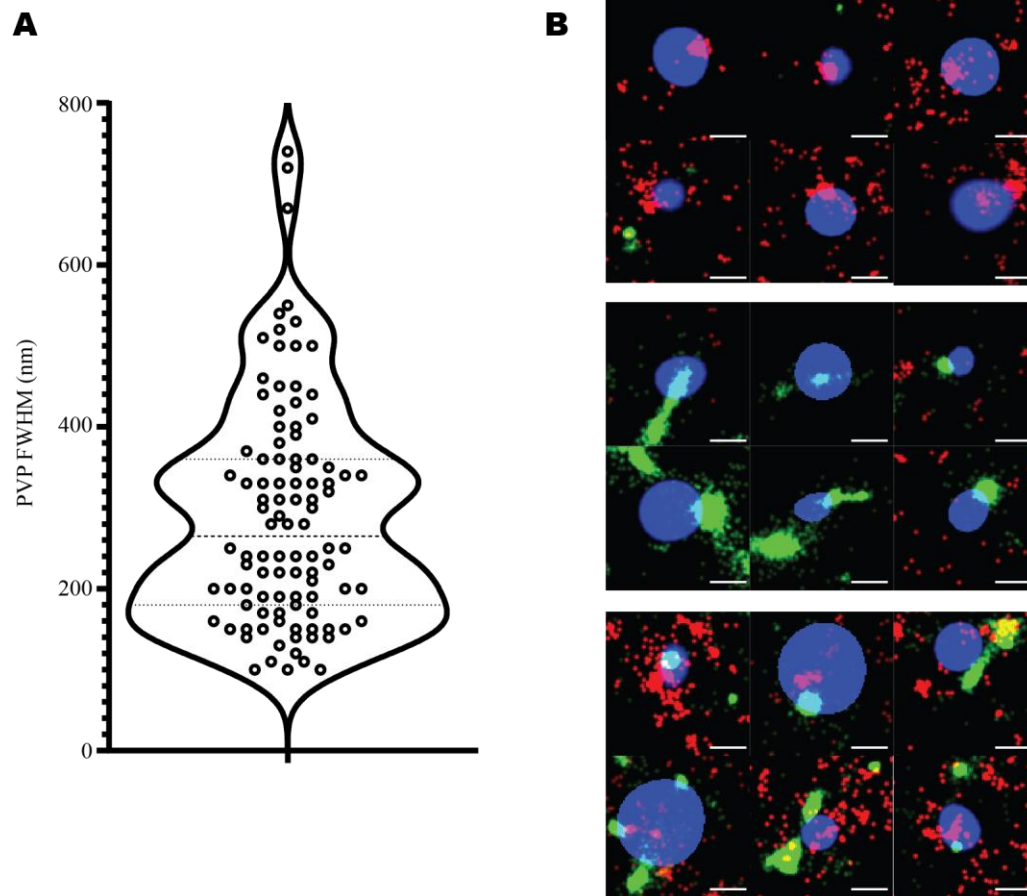

**Supplementary Figure 3:** (A) PVP FWHM size distribution from STORM/TIRF images. 100 random particles from different variants display an average particle size of approximately 275 nm. Distribution is not significantly different between variants. (B) Representative magnified STORM/TIRF images of single PVPs colocalized with ACE2 (*top*), Nrp1 (*middle*), or ACE2/Nrp1 (*bottom*). Scale bar represents 200 nm.

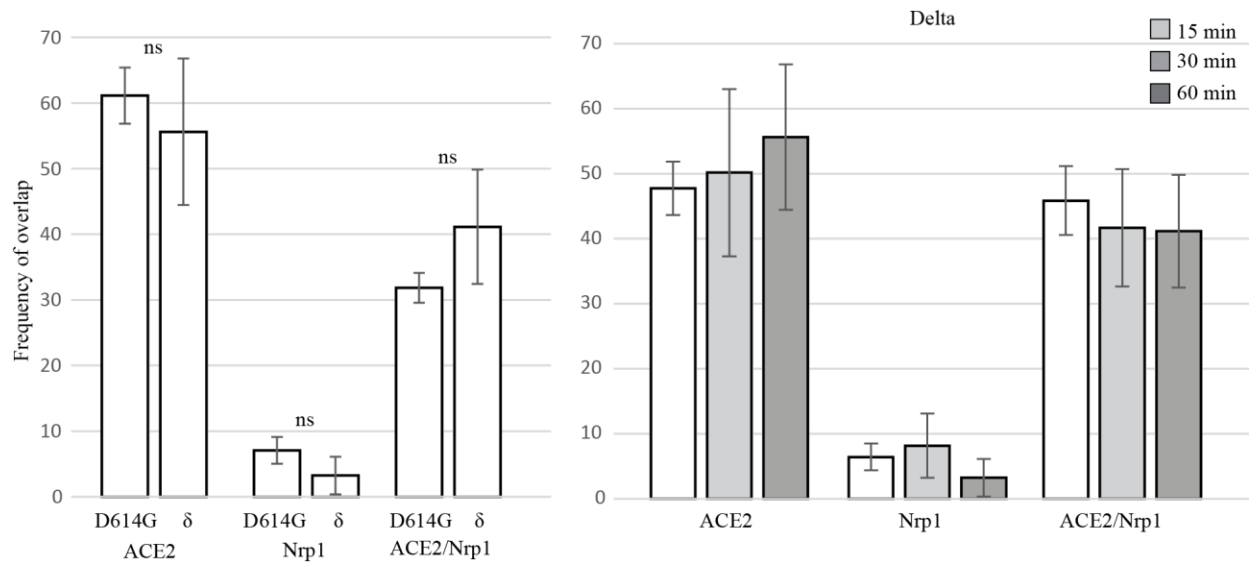

**Supplementary Figure 4:** PVPs were categorized into colocalization populations according to Fig. 2D and calculated as a percent of total observed particles. *Left* Comparison of D614G and Delta variant S STORM imaging. *Right* Overlap is relatively consistent across time points for delta variant.

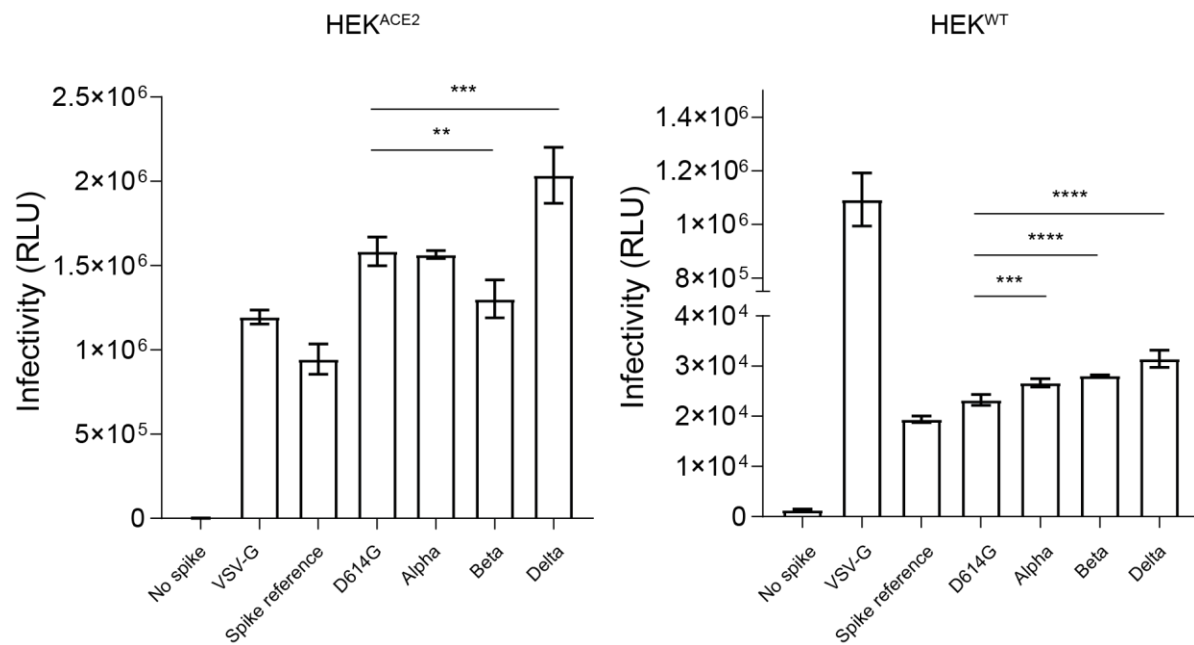

**Supplementary Figure 5:** Infectivity of variant S PVPs. Virus titers (No S, VSV-G, S reference (D614), D614G, Alpha, Beta, and Delta) were normalized for RT activity. MOI = 0.2 added to HEK<sup>ACE2</sup> (left) or HEK<sup>WT</sup> (right). Luciferase activity was measured two days post-infection. The experiments were repeated twice with similar results. \*\* represents p-value<0.01, \*\*\* represents p-value<0.001, and \*\*\*\* represents p-value<0.0001.

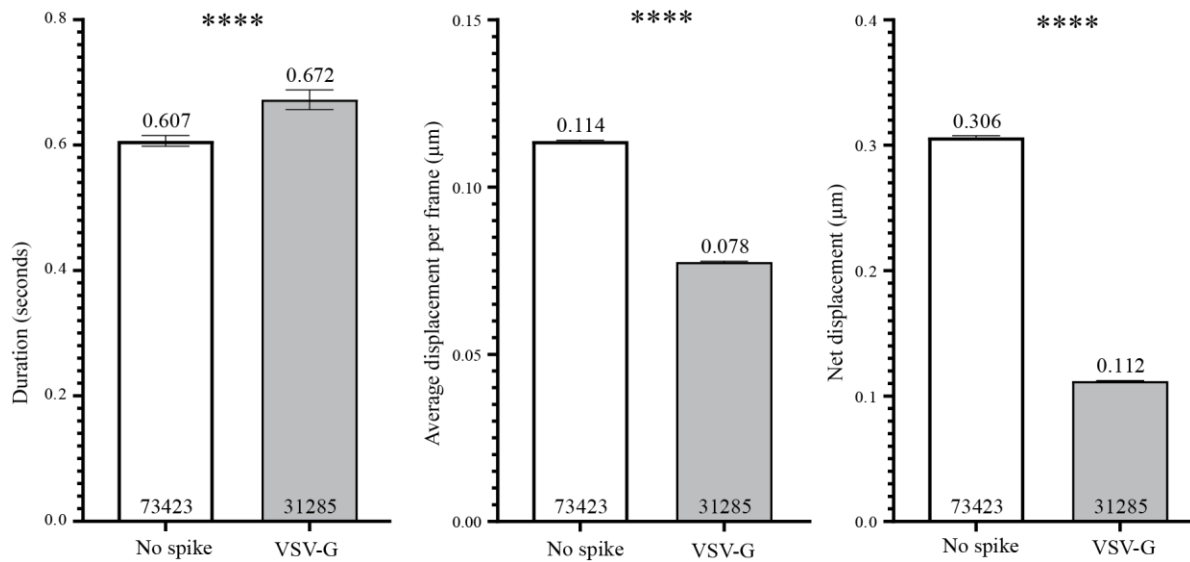

**Supplementary Figure 6:** PVP controls with BEAS-2B cells show duration and displacement trends as expected. VSV-G is able to bind a broad range of cell lines expressing low-density lipoprotein receptor and as such has increased trajectory duration and decreased displacement (both displacement/frame and net displacement) compared to the PVP without a viral glycoprotein.

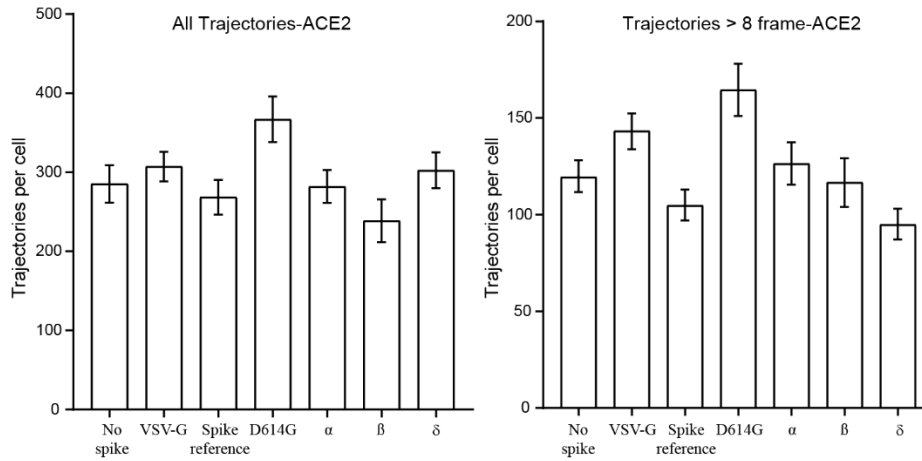

**Supplementary Figure 7:** Trajectories per cell are consistent across S variants. This indicates that the initial diffusion near the cell surface is not dependent on the viral particle glycoprotein, but the glycoprotein does control dynamics of interaction at the cell membrane.

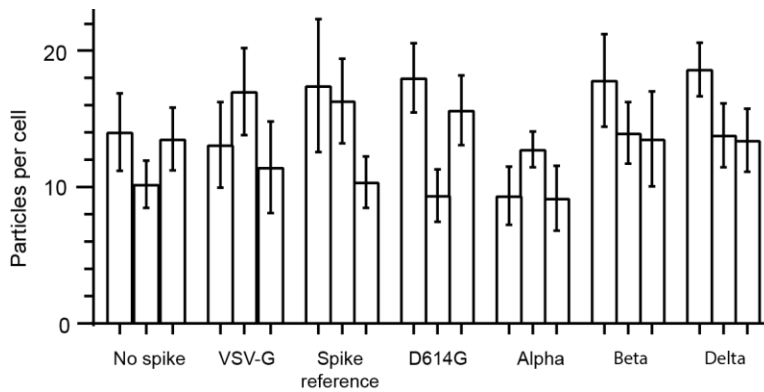

**Supplementary Figure 8:** Particles detected per cell in STORM images is relatively consistent across S variants and time points.

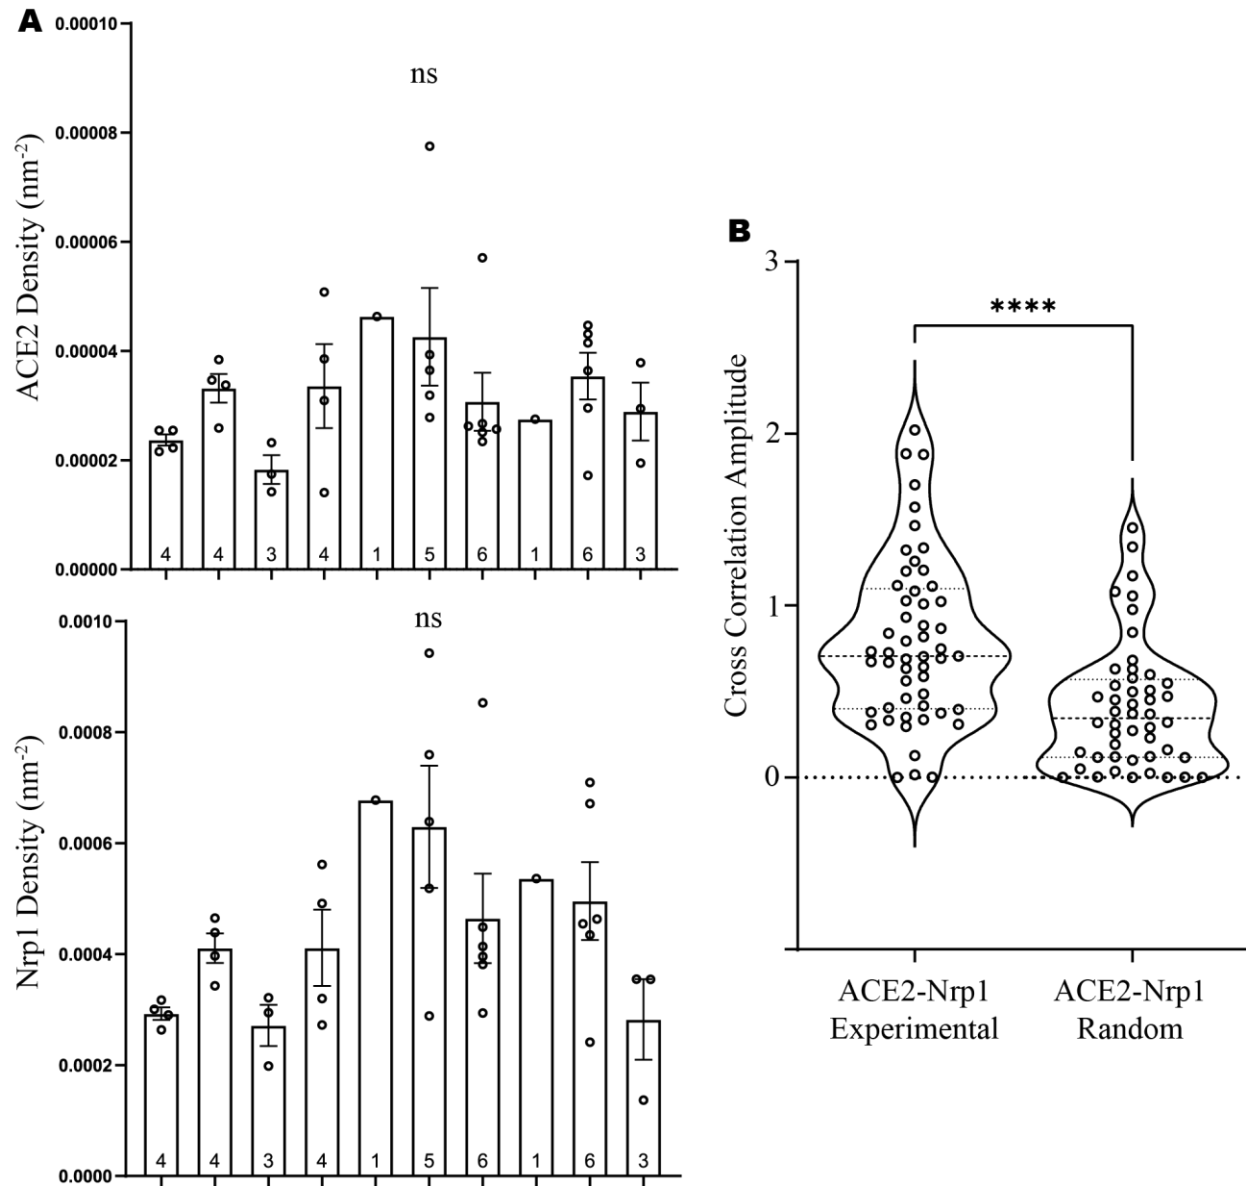

**Supplementary Figure 9:** (A) Receptor density quantified by auto-correlation from a subset of reconstructed cell images. Density of either receptor is not significantly different between cells, with some variability between ROIs of the same cell. (B) Receptor colocalization quantified by cross-correlation of experimental and randomized ROIs (n=54). A significant decrease from experimental to randomized ROIs validates that experimental samples have genuine colocalization of the receptors of interest.
